# Supplementary material for: O–H vibrational motions promote sub-50 fs nonadiabatic dynamics in 3-hydroxypyran-4-one: interplay between internal conversion and ESIPT
Source: Royal Society of Chemistry journal article supplement (doi:10.1039/d0cp00741b), 2020-01-01
Supplement: d0cp00741b1.pdf [file d0cp00741b1.pdf]

## Supporting Material:

# O-H vibrational motions promote sub-50 fs nonadiabatic dynamics in 3-hydroxypyran-4-one : Interplay between internal conversion and ESIPT

Neethu Anand,<sup>†</sup> Probal Nag,<sup>†</sup> Ravi Kumar Kanaparthi,<sup>\*,‡</sup> and Sivaranjana Reddy  
Vennapusa<sup>\*,†</sup>

<sup>†</sup>*Indian Institute of Science Education and Research Thiruvananthapuram, Maruthamala  
PO, Vithura, Thiruvananthapuram 695551, India*

<sup>‡</sup>*Central University of Kerala, School of Physical Sciences, Tejaswini Hills, Periya, Kerala  
671320, India*

E-mail: rkchem@cukerala.ac.in; siva@iisertvm.ac.in

# Table of contents

- SM1: Molecular Orbitals of 3HOX, 3HC and 3HF molecules
- SM2: Vibrational frequencies of 3HOX at the DFT level of theory
- SM3: Linear intrastate vibronic coupling parameters of 3HOX (TD-DFT level)
- SM4: Linear intrastate vibronic coupling parameters of 3HOX (EOM-CCSD and RI-CC2 level) level of theory)
- SM5: Linear interstate coupling parameters of 3HOX (TD-DFT level)
- SM6: Linear interstate coupling parameters of 3HOX (EOM-CCSD and RI-CC2 level)
- SM7: MCTDH details of 3HOX (TD-B3LYP and TD-CAMB3LYP)
- SM8: MCTDH details of 3HOX (EOM-CCSD and RI-CC2)
- SM9: Structural parameters of the FC geometry,  $Q_{c,3}^{\min}$  and  $Q_{c,30}^{\min}$  of 3HOX
- SM10:  $S_1$ - $S_2$  conical intersection seam between  $Q_3$  and  $Q_{30}$  normal coordinate space of 3HOX
- SM11: Experimental UV/vis spectroscopy measurements
- SM12: Experimental absorption spectrum, adiabatic potential energy curves along O-H stretch and vertical excitation energy (VEE) of 3HOX
- SM13:  $Q_{c,min}$  of totally symmetric vibrations of 3HOX
- SM14: VEE of keto tautomer and experimental fluorescence spectrum of 3HOX
- SM15: MCTDH 1-D nuclear density along the O-H in-plane bend coordinates
- SM16: MCTDH 1-D nuclear density along the O-H stretch coordinates
- SM17: MCTDH 1-D nuclear density along the O-H out-of-plane coordinates

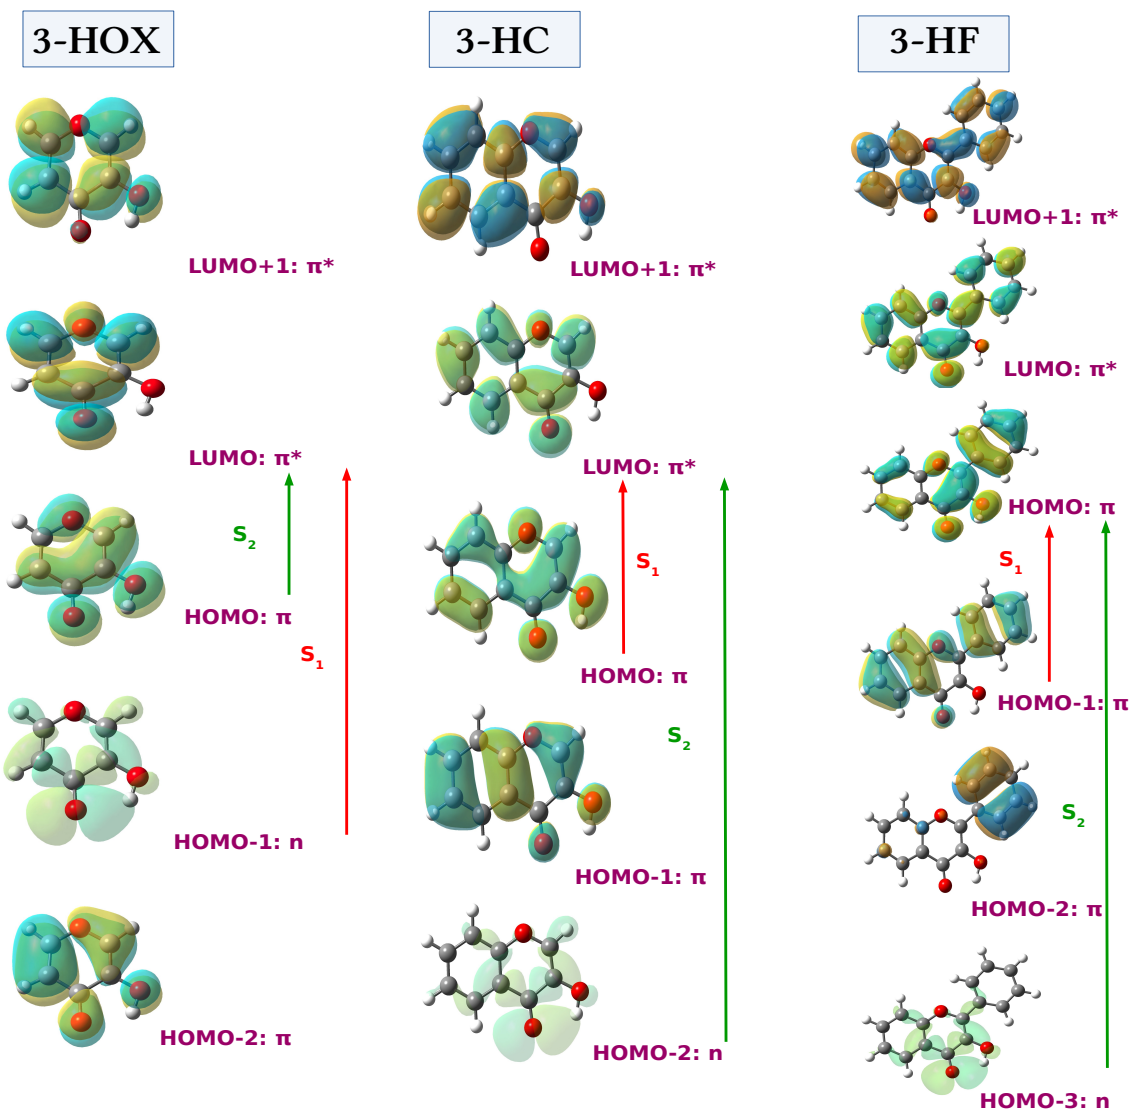

SM1: Frontier molecular orbitals of 3HOX (3-hydroxy-2-pyrone), 3HC (3-hydroxychromone) and 3HF (3-hydroxyflavone) obtained at B3LYP/6-311++G\*\* level of theory. The vertical transition oscillator strength,  $f$ , of  $S_1$  and  $S_2$  states are given in parenthesis.

Table SM2: Numbering, symmetry and harmonic frequency components of vibrational modes of 3HOX calculated at B3LYP and CAM-B3LYP with the 6-311++G(d,p) level of theory.

|                 | B3LYP                       | CAM-B3LYP                   |
|-----------------|-----------------------------|-----------------------------|
| No.(Sym.)       | $\omega(\text{in cm}^{-1})$ | $\omega(\text{in cm}^{-1})$ |
| $\nu_1(a'')$    | 156.1187                    | 155.2476                    |
| $\nu_2(a'')$    | 294.8692                    | 300.8056                    |
| $\nu_3(a')$     | 304.4567                    | 309.1258                    |
| $\nu_4(a'')$    | 405.2689                    | 408.4052                    |
| $\nu_5(a')$     | 459.3979                    | 463.9359                    |
| $\nu_6(a'')$    | 522.5628                    | 527.4913                    |
| $\nu_7(a')$     | 564.0986                    | 571.4880                    |
| $\nu_8(a')$     | 598.0276                    | 605.6345                    |
| $\nu_9(a'')$    | 615.6084                    | 606.6996                    |
| $\nu_{10}(a'')$ | 742.7613                    | 752.0911                    |
| $\nu_{11}(a')$  | 762.7264                    | 776.0833                    |
| $\nu_{12}(a'')$ | 827.8404                    | 841.8632                    |
| $\nu_{13}(a'')$ | 845.1885                    | 868.3543                    |
| $\nu_{14}(a')$  | 883.4481                    | 895.7784                    |
| $\nu_{15}(a'')$ | 947.2509                    | 976.4400                    |
| $\nu_{16}(a')$  | 1005.1597                   | 1024.8686                   |
| $\nu_{17}(a')$  | 1119.4547                   | 1140.6116                   |
| $\nu_{18}(a')$  | 1209.0360                   | 1220.6587                   |
| $\nu_{19}(a')$  | 1277.7829                   | 1292.4934                   |
| $\nu_{20}(a')$  | 1281.4350                   | 1301.7508                   |
| $\nu_{21}(a')$  | 1341.9677                   | 1358.6890                   |
| $\nu_{22}(a')$  | 1427.8683                   | 1443.4241                   |
| $\nu_{23}(a')$  | 1468.0179                   | 1502.1466                   |
| $\nu_{24}(a')$  | 1608.7256                   | 1650.3827                   |
| $\nu_{25}(a')$  | 1687.1427                   | 1734.5041                   |
| $\nu_{26}(a')$  | 1694.6784                   | 1742.2511                   |
| $\nu_{27}(a')$  | 3206.8844                   | 3231.4065                   |
| $\nu_{28}(a')$  | 3226.7817                   | 3248.9761                   |
| $\nu_{29}(a')$  | 3243.9458                   | 3265.5342                   |
| $\nu_{30}(a')$  | 3608.9645                   | 3661.8998                   |

Table SM3: Linear intrastate coupling parameters ( $\kappa$ ) of  $S_1$  and  $S_2$  states of 3HOX using TD-B3LYP/6-311++G\*\* and TD-CAMB3LYP/6-311++G\*\* level of theory. All values are in eV. The coupling strength ( $\kappa^2/2\omega^2$ ) is given in the paranthesis.

| TD-B3LYP                 |                |                | TD-CAMB3LYP         |                |                |
|--------------------------|----------------|----------------|---------------------|----------------|----------------|
| $a'$ mode<br>[frequency] | $\kappa^{S_1}$ | $\kappa^{S_2}$ | $a'$ mode           | $\kappa^{S_1}$ | $\kappa^{S_2}$ |
| $\nu_3$ [0.0377]         | -0.0635 (1.42) | 0.0396 (0.55)  | $\nu_3$ [0.0383]    | -0.0663 (1.50) | 0.0401 (0.55)  |
| $\nu_5$ [0.0570]         | -0.0057 (0.00) | -0.0762 (0.89) | $\nu_5$ [0.0575]    | -0.0029 (0.00) | -0.0782 (0.92) |
| $\nu_7$ [0.0699]         | -0.0134 (0.02) | -0.0092 (0.01) | $\nu_7$ [0.0709]    | -0.0097 (0.01) | -0.0101 (0.01) |
| $\nu_8$ [0.0741]         | 0.0310 (0.09)  | -0.0354 (0.11) | $\nu_8$ [0.0751]    | 0.0321 (0.09)  | -0.0370 (0.12) |
| $\nu_{11}$ [0.0946]      | -0.0041 (0.00) | 0.0702 (0.28)  | $\nu_{11}$ [0.0962] | 0.0141 (0.01)  | 0.0540 (0.16)  |
| $\nu_{14}$ [0.1095]      | -0.0336 (0.05) | 0.0221 (0.02)  | $\nu_{14}$ [0.1111] | -0.0262 (0.03) | 0.0526 (0.11)  |
| $\nu_{16}$ [0.1246]      | 0.0768 (0.19)  | 0.1257 (0.51)  | $\nu_{16}$ [0.1271] | 0.0676 (0.14)  | 0.1217 (0.46)  |
| $\nu_{17}$ [0.1388]      | -0.0373 (0.04) | 0.0153 (0.01)  | $\nu_{17}$ [0.1414] | -0.0343 (0.03) | 0.0143 (0.01)  |
| $\nu_{18}$ [0.1499]      | -0.0389 (0.03) | -0.0312 (0.02) | $\nu_{18}$ [0.1513] | -0.0170 (0.01) | -0.0097 (0.00) |
| $\nu_{19}$ [0.1584]      | 0.0422 (0.04)  | 0.0543 (0.06)  | $\nu_{19}$ [0.1602] | 0.0452 (0.04)  | -0.0119 (0.00) |
| $\nu_{20}$ [0.1589]      | 0.0494 (0.05)  | -0.0338 (0.02) | $\nu_{20}$ [0.1614] | 0.0359 (0.02)  | 0.0390 (0.03)  |
| $\nu_{21}$ [0.1664]      | 0.0090 (0.00)  | -0.1207 (0.26) | $\nu_{21}$ [0.1685] | 0.0080 (0.00)  | -0.1108 (0.22) |
| $\nu_{22}$ [0.1770]      | -0.0428 (0.03) | 0.0896 (0.13)  | $\nu_{22}$ [0.1790] | -0.0557 (0.05) | 0.0686 (0.07)  |
| $\nu_{23}$ [0.1820]      | 0.0042 (0.00)  | 0.1157 (0.20)  | $\nu_{23}$ [0.1862] | -0.0077 (0.00) | 0.1104 (0.18)  |
| $\nu_{24}$ [0.1995]      | 0.0699 (0.06)  | 0.0570 (0.04)  | $\nu_{24}$ [0.2046] | 0.0747 (0.07)  | 0.0933 (0.10)  |
| $\nu_{25}$ [0.2092]      | 0.2690 (0.83)  | 0.1106 (0.14)  | $\nu_{25}$ [0.2151] | 0.1721 (0.32)  | 0.1672 (0.30)  |
| $\nu_{26}$ [0.2101]      | 0.1023 (0.12)  | -0.0622 (0.04) | $\nu_{26}$ [0.2160] | 0.1926 (0.40)  | -0.0419 (0.02) |
| $\nu_{27}$ [0.3976]      | 0.0053 (0.00)  | 0.0109 (0.00)  | $\nu_{27}$ [0.4006] | 0.0029 (0.00)  | 0.0160 (0.00)  |
| $\nu_{28}$ [0.4001]      | -0.0109 (0.00) | -0.0255 (0.00) | $\nu_{28}$ [0.4028] | -0.0062 (0.00) | -0.0187 (0.00) |
| $\nu_{29}$ [0.4022]      | -0.0081 (0.00) | -0.0080 (0.00) | $\nu_{29}$ [0.4049] | -0.0058 (0.00) | -0.0135 (0.00) |
| $\nu_{30}$ [0.4475]      | -0.0698 (0.01) | 0.0689 (0.01)  | $\nu_{30}$ [0.4540] | -0.0659 (0.01) | 0.0675 (0.01)  |

Table SM4: Linear intrastate coupling parameters ( $\kappa$ ) of  $S_1$  and  $S_2$  states of 3HOX using EOM-CCSD/6-311++G\*\* and RI-CC2/6-311++G\*\* level of theory. All values are in eV. The coupling strength ( $\kappa^2/2\omega^2$ ) is given in the paranthesis.

| EOM-CCSD            |                |                | RI-CC2              |                |                |
|---------------------|----------------|----------------|---------------------|----------------|----------------|
| $a'$ mode           | $\kappa^{S_1}$ | $\kappa^{S_2}$ | $a'$ mode           | $\kappa^{S_1}$ | $\kappa^{S_2}$ |
| [frequency]         |                |                |                     |                |                |
| $\nu_3$ [0.0377]    | -0.0585 (1.21) | 0.0479 (0.81)  | $\nu_3$ [0.0377]    | -0.0487 (0.83) | 0.0509 (0.91)  |
| $\nu_5$ [0.0570]    | -0.0022 (0.00) | -0.0707 (0.77) | $\nu_5$ [0.0570]    | -0.0059 (0.01) | -0.0743 (0.85) |
| $\nu_7$ [0.0699]    | -0.0094 (0.01) | 0.0033 (0.00)  | $\nu_7$ [0.0699]    | -0.0124 (0.02) | 0.0042 (0.00)  |
| $\nu_8$ [0.0741]    | 0.0329 (0.10)  | -0.0327 (0.10) | $\nu_8$ [0.0741]    | 0.0308 (0.09)  | -0.0373 (0.13) |
| $\nu_{11}$ [0.0946] | 0.0148 (0.01)  | 0.0428 (0.10)  | $\nu_{11}$ [0.0946] | -0.0085 (0.00) | 0.0654 (0.24)  |
| $\nu_{14}$ [0.1095] | -0.0212 (0.02) | 0.0933 (0.36)  | $\nu_{14}$ [0.1095] | -0.0229 (0.02) | 0.0726 (0.22)  |
| $\nu_{16}$ [0.1246] | 0.0686 (0.15)  | 0.1217 (0.48)  | $\nu_{16}$ [0.1246] | 0.0717 (0.17)  | 0.1309 (0.55)  |
| $\nu_{17}$ [0.1388] | -0.0265 (0.02) | 0.0299 (0.02)  | $\nu_{17}$ [0.1388] | -0.0285 (0.02) | 0.0258 (0.02)  |
| $\nu_{18}$ [0.1499] | -0.0167 (0.01) | -0.0417 (0.05) | $\nu_{18}$ [0.1499] | -0.0422 (0.04) | -0.0279 (0.02) |
| $\nu_{19}$ [0.1584] | 0.0291 (0.02)  | 0.0491 (0.05)  | $\nu_{19}$ [0.1584] | 0.0402 (0.03)  | 0.0581 (0.07)  |
| $\nu_{20}$ [0.1589] | 0.0432 (0.04)  | -0.0222 (0.01) | $\nu_{20}$ [0.1589] | 0.0441 (0.04)  | -0.0386 (0.03) |
| $\nu_{21}$ [0.1664] | 0.0101 (0.00)  | -0.1270 (0.29) | $\nu_{21}$ [0.1664] | 0.0106 (0.00)  | -0.1420 (0.36) |
| $\nu_{22}$ [0.1770] | -0.0646 (0.07) | 0.0846 (0.11)  | $\nu_{22}$ [0.1770] | -0.0538 (0.05) | 0.0906 (0.13)  |
| $\nu_{23}$ [0.1820] | -0.0074 (0.00) | 0.1166 (0.21)  | $\nu_{23}$ [0.1820] | -0.0089 (0.00) | 0.1260 (0.24)  |
| $\nu_{24}$ [0.1995] | 0.0960 (0.12)  | 0.0728 (0.07)  | $\nu_{24}$ [0.1995] | 0.0873 (0.10)  | 0.0914 (0.10)  |
| $\nu_{25}$ [0.2092] | 0.2728 (0.85)  | 0.1990 (0.45)  | $\nu_{25}$ [0.2092] | 0.3390 (1.31)  | 0.1488 (0.25)  |
| $\nu_{26}$ [0.2101] | 0.1230 (0.17)  | -0.1098 (0.13) | $\nu_{26}$ [0.2101] | 0.1121 (0.14)  | -0.0826 (0.08) |
| $\nu_{27}$ [0.3976] | 0.0029 (0.00)  | 0.0176 (0.00)  | $\nu_{27}$ [0.3976] | 0.0059 (0.00)  | 0.0170 (0.00)  |
| $\nu_{28}$ [0.4001] | -0.0055 (0.00) | -0.0269 (0.00) | $\nu_{28}$ [0.4001] | -0.0067 (0.00) | -0.0217 (0.00) |
| $\nu_{29}$ [0.4022] | -0.0051 (0.00) | -0.0141 (0.00) | $\nu_{29}$ [0.4022] | -0.0084 (0.00) | -0.0089 (0.00) |
| $\nu_{30}$ [0.4475] | -0.0580 (0.01) | 0.0688 (0.01)  | $\nu_{30}$ [0.4475] | -0.0610 (0.01) | 0.0911 (0.02)  |

Table SM5: Linear interstate coupling parameters ( $\lambda$ ) associated with  $S_1$ - $S_2$  states of 3HOX using TD-B3LYP/6-311++G\*\* and TD-CAMB3LYP/6-311++G\*\* level of theory. All values are in eV.

| TD-B3LYP                |                     | TD-CAMB3LYP             |                     |
|-------------------------|---------------------|-------------------------|---------------------|
| a" modes<br>(Frequency) | $\lambda_{S_1-S_2}$ | a" modes<br>(Frequency) | $\lambda_{S_1-S_2}$ |
| $\nu_1$ (0.0194)        | -                   | $\nu_1$ (0.0192)        | -                   |
| $\nu_2$ (0.0366)        | 0.0296              | $\nu_2$ (0.0373)        | 0.0206              |
| $\nu_4$ (0.0502)        | -                   | $\nu_4$ (0.0506)        | -                   |
| $\nu_6$ (0.0648)        | -                   | $\nu_6$ (0.0654)        | -                   |
| $\nu_9$ (0.0763)        | 0.0648              | $\nu_9$ (0.0752)        | 0.0768              |
| $\nu_{10}$ (0.0921)     | 0.0248              | $\nu_{10}$ (0.0932)     | 0.0278              |
| $\nu_{12}$ (0.1026)     | 0.0372              | $\nu_{12}$ (0.1044)     | 0.0221              |
| $\nu_{13}$ (0.1048)     | 0.0585              | $\nu_{13}$ (0.1077)     | 0.0515              |
| $\nu_{15}$ (0.1174)     | -                   | $\nu_{15}$ (0.1211)     | -                   |

Table SM6: Linear interstate coupling parameters ( $\lambda$ ) associated with  $S_1$ - $S_2$  states of 3HOX using EOM-CCSD/6-311++G\*\* and RI-CC2/6-311++G\*\* level of theory. All values are in eV.

| EOM-CCSD                |                     | RI-CC2                  |                     |
|-------------------------|---------------------|-------------------------|---------------------|
| a" modes<br>(Frequency) | $\lambda_{S_1-S_2}$ | a" modes<br>(Frequency) | $\lambda_{S_1-S_2}$ |
| $\nu_1$ (0.0194)        | -                   | $\nu_1$ (0.0194)        | -                   |
| $\nu_2$ (0.0366)        | 0.0232              | $\nu_2$ (0.0366)        | 0.0362              |
| $\nu_4$ (0.0502)        | 0.0201              | $\nu_4$ (0.0502)        | 0.0245              |
| $\nu_6$ (0.0648)        | -                   | $\nu_6$ (0.0648)        | -                   |
| $\nu_9$ (0.0763)        | 0.0924              | $\nu_9$ (0.0763)        | 0.0759              |
| $\nu_{10}$ (0.0921)     | -                   | $\nu_{10}$ (0.0921)     | 0.0133              |
| $\nu_{12}$ (0.1026)     | 0.0270              | $\nu_{12}$ (0.1026)     | 0.0381              |
| $\nu_{13}$ (0.1048)     | 0.0412              | $\nu_{13}$ (0.1048)     | 0.0564              |
| $\nu_{15}$ (0.1174)     | -                   | $\nu_{15}$ (0.1174)     | -                   |



## MCTDH initial wavepacket

We have chosen a total 26 vibrational modes (out of 30, four non-totally symmetric modes i.e.,  $a''$ , show zero inter-state coupling) based on their respective excitation strength (cf., SI3-SI6) for the wavepacket propagation calculations. The initial wavepacket ( $\Psi_f(0)$ ) is placed vertically on to the "bright"  $S_2$  state, i.e.,  $\Psi_f(t) = e^{-iHt/\hbar} \Psi_f(0)$  where  $H$  is the 2x2 vibronic Hamiltonian. The wavepacket is then allowed to evolve for a period of 300 fs. The absorption spectrum is generated by Fourier transformation of the autocorrelation function of the wavepacket evolving on  $S_2$  state. The intensity  $I(E)$  of the spectrum is expressed as

$$I(E) \propto \int e^{iEt} a(t) dt, \quad (1)$$

where  $a(t)$  denotes the time autocorrelation function. The latter quantity is evaluated as  $a(t) = \langle \Psi_f(0) | \Psi_f(t) \rangle$ .

Number of basis functions for the primitive as well as the single-particle basis used in the MCTDH calculations are given in SM7-SM8.

Table SM7: MCTDH details of normal mode combination, size of the primitive and single particle bases used in the  $S_1$ - $S_2$  vibronic dynamics of 3HOX for TD-B3LYP and TD-CAMB3LYP vibronic coupling parameters.

|             | Normal modes                                         | Primitive basis     | SPF basis<br>[ $S_1$ , $S_2$ ] |
|-------------|------------------------------------------------------|---------------------|--------------------------------|
| TD-B3LYP    | $(\nu_3, \nu_5, \nu_7, \nu_8, \nu_{27}, \nu_{28})$   | (9, 10, 6, 7, 4, 4) | [12, 14]                       |
|             | $(\nu_{11}, \nu_{14}, \nu_{20}, \nu_{29}, \nu_{30})$ | (7, 6, 6, 4, 5)     | [14,12]                        |
|             | $(\nu_{16}, \nu_{17}, \nu_{18}, \nu_2, \nu_9)$       | (9, 6, 6, 10, 10)   | [12, 14]                       |
|             | $(\nu_{19}, \nu_{21}, \nu_{22}, \nu_{10}, \nu_{12})$ | (6, 7, 7, 4,6)      | [12, 14]                       |
|             | $(\nu_{23}, \nu_{24}, \nu_{25}, \nu_{26}, \nu_{13})$ | (7, 6, 10, 7, 7)    | [14, 12]                       |
|             | Normal modes                                         | Primitive basis     | SPF basis<br>[ $S_1$ , $S_2$ ] |
| TD-CAMB3LYP | $(\nu_3, \nu_5, \nu_7, \nu_8, \nu_{27}, \nu_{28})$   | (10, 9, 5, 6, 4, 4) | [12, 14]                       |
|             | $(\nu_{11}, \nu_{14}, \nu_{20}, \nu_{29}, \nu_{30})$ | (6, 6, 5, 4, 5)     | [14, 12]                       |
|             | $(\nu_{16}, \nu_{17}, \nu_{18}, \nu_2, \nu_9)$       | (7, 5, 4, 7, 10)    | [12, 14]                       |
|             | $(\nu_{19}, \nu_{21}, \nu_{22}, \nu_{10}, \nu_{12})$ | (5, 6, 6, 5, 4)     | [12, 14]                       |
|             | $(\nu_{23}, \nu_{24}, \nu_{25}, \nu_{26}, \nu_{13})$ | (6, 6, 7, 7, 6)     | [14, 12]                       |

Table SM8: MCTDH details of normal mode combination, size of the primitive and single particle bases used in the  $S_1$ - $S_2$  vibronic dynamics of 3HOX for EOM-CCSD and RI-CC2 vibronic coupling parameters.

|          | Normal modes                                         | Primitive basis     | SPF basis<br>[ $S_1, S_2$ ] |
|----------|------------------------------------------------------|---------------------|-----------------------------|
| EOM-CCSD | $(\nu_3, \nu_5, \nu_7, \nu_8, \nu_{27}, \nu_{28})$   | (10, 7, 5, 7, 4, 4) | [12, 14]                    |
|          | $(\nu_{11}, \nu_{14}, \nu_{20}, \nu_{29}, \nu_{30})$ | (6, 8, 5, 4, 4)     | [14, 12]                    |
|          | $(\nu_{16}, \nu_{17}, \nu_{18}, \nu_2, \nu_4)$       | (8, 5, 5, 7, 6)     | [12, 14]                    |
|          | $(\nu_{19}, \nu_{21}, \nu_{22}, \nu_9, \nu_{12})$    | (5, 7, 6, 10, 5)    | [12, 14]                    |
|          | $(\nu_{23}, \nu_{24}, \nu_{25}, \nu_{26}, \nu_{13})$ | (7, 6, 9, 6, 6)     | [14, 12]                    |
|          | Normal modes                                         | Primitive basis     | SPF basis<br>[ $S_1, S_2$ ] |
| RI-CC2   | $(\nu_3, \nu_5, \nu_7, \nu_8, \nu_{27}, \nu_{28})$   | (9, 10, 6, 7, 4, 4) | [12, 14]                    |
|          | $(\nu_{11}, \nu_{14}, \nu_{20}, \nu_{29}, \nu_{30})$ | (7, 6, 6, 4, 5)     | [14, 12]                    |
|          | $(\nu_{16}, \nu_{17}, \nu_{18}, \nu_2, \nu_9)$       | (9, 6, 6, 10, 10)   | [12, 14]                    |
|          | $(\nu_{19}, \nu_{21}, \nu_{22}, \nu_{10}, \nu_{12})$ | (6, 7, 7, 4, 6)     | [12, 14]                    |
|          | $(\nu_{23}, \nu_{24}, \nu_{25}, \nu_{26}, \nu_{13})$ | (7, 6, 10, 7, 7)    | [14, 12]                    |

In general, the primitive basis (time-independent) are chosen as discrete variable representation (DVR) such a harmonic oscillator functions, sine functions, Legendre functions etc. Here we chose harmonic oscillator DVR in the dimensionless coordinate system for the relevant vibrational mode. The primitive basis for each particle is the product of the one-dimensional bases; e.g for particle 1 in the set of TD-B3LYP (SM7), the primitive basis contains  $9 \times 10 \times 6 \times 7 \times 4 \times 4 = 60480$  functions and the full primitive basis consists of a total of  $1.43 \times 10^{21}$  functions. Similarly, a full primitive basis of  $1.23 \times 10^{20}$ ,  $1.81 \times 10^{20}$  and  $1.43 \times 10^{21}$  for TD-CAMB3LYP, EOM-CCSD and RI-CC2 is employed, respectively.

The wavefunction expansion length is the total single-particle functions basis size. This quantity is equal to the product of the number of SPFs per particle, summed over the 2 states.

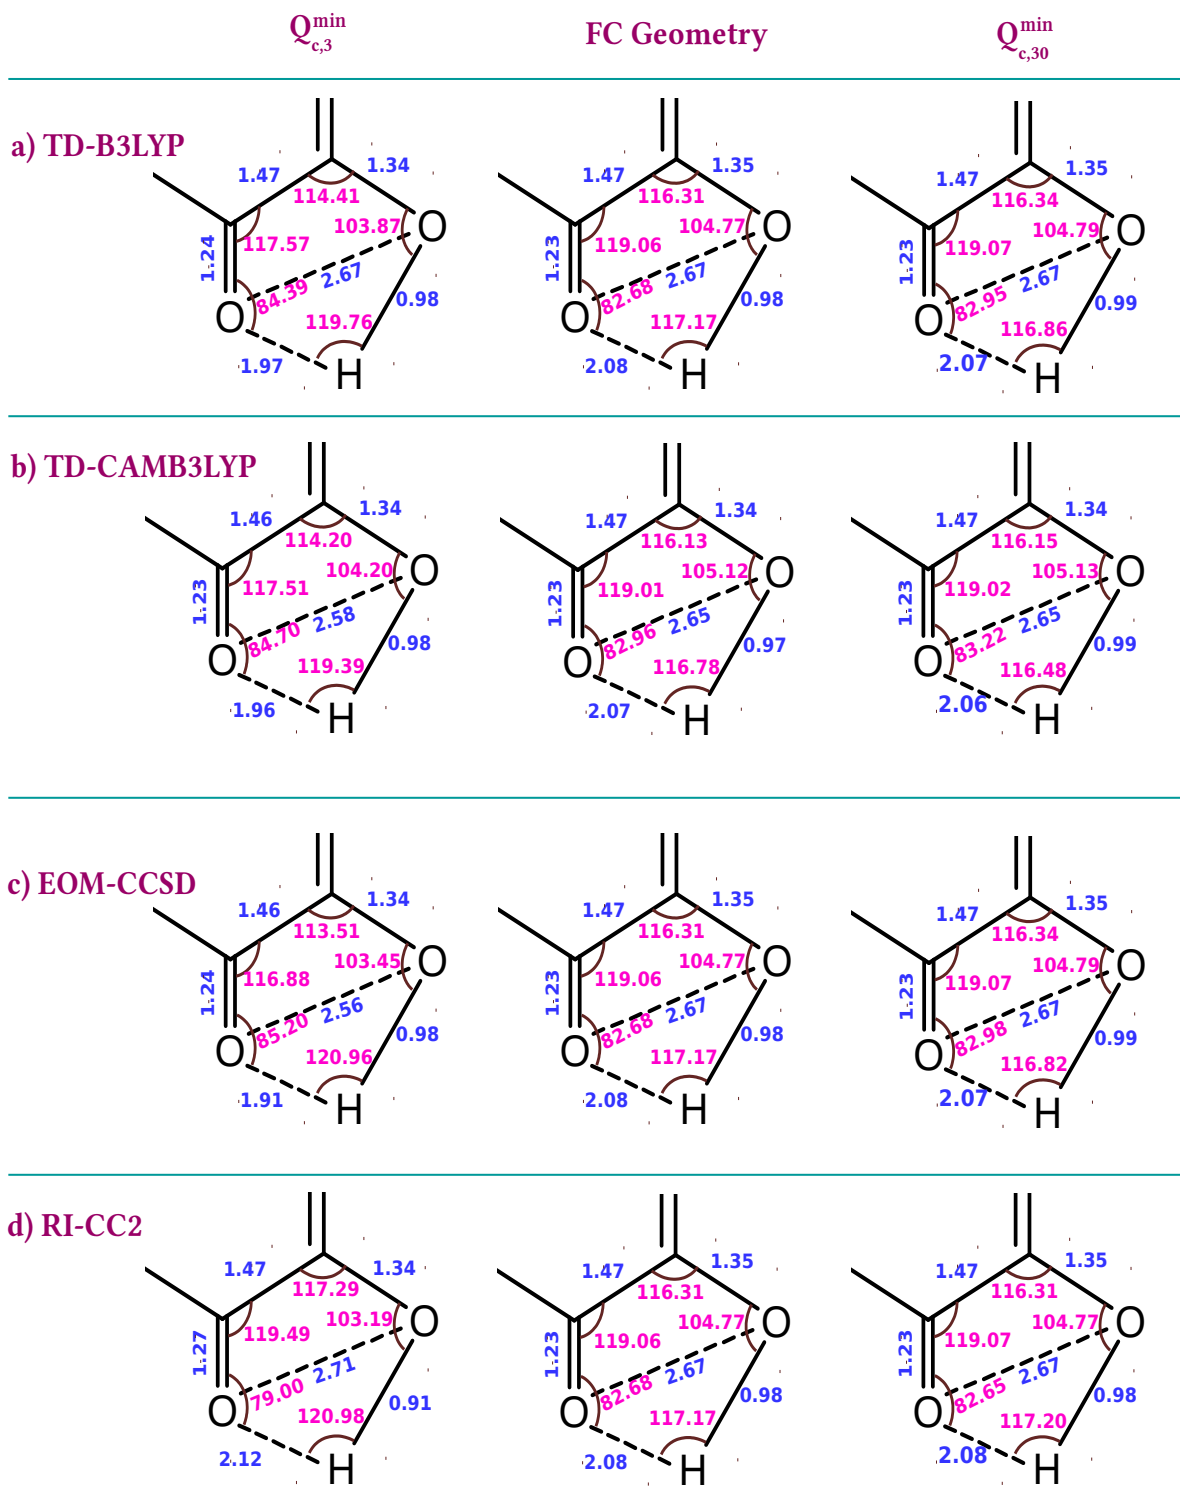

SM9: Structural parameters (distances in blue color and angles in magenta color) of the FC geometry,  $Q_{c,3}^{\min}$  and  $Q_{c,30}^{\min}$  of 3-HOX.

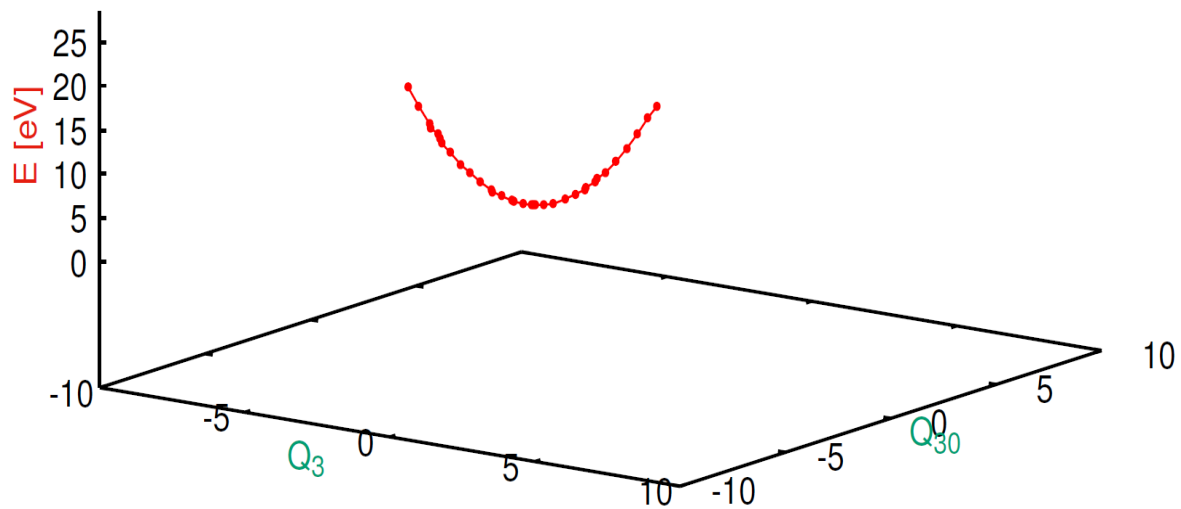

SM10:  $S_1$ - $S_2$  conical intersection seam between  $Q_3$  and  $Q_{30}$  normal coordinate space of 3-HOX.

### SM11: Experimental UV/vis spectroscopy measurements

3-HOX, procured from R Scientific (India), was recrystallized from ethanol and subsequently used in all photophysical studies. Solvents used in this study have been procured from Merck (India) and dried using appropriate drying agents and then distilled prior to spectral measurements. Optical absorption spectra were recorded on a Shimadzu (Model UV-3600) spectrophotometer. Concentrations of solutions are ca. to be  $1.0 \times 10^{-6}$  M.

We show experimental absorption spectral features of 3-HOX in Fig. 1 Two distinct absorption bands, centered at 4.7 eV and 5.9 eV, are observed. The intensity of lower energy band is found to be slightly smaller than the higher energy band (cf., Fig. 1). Both bands exhibit a broad structureless feature regardless of solvent polarity.

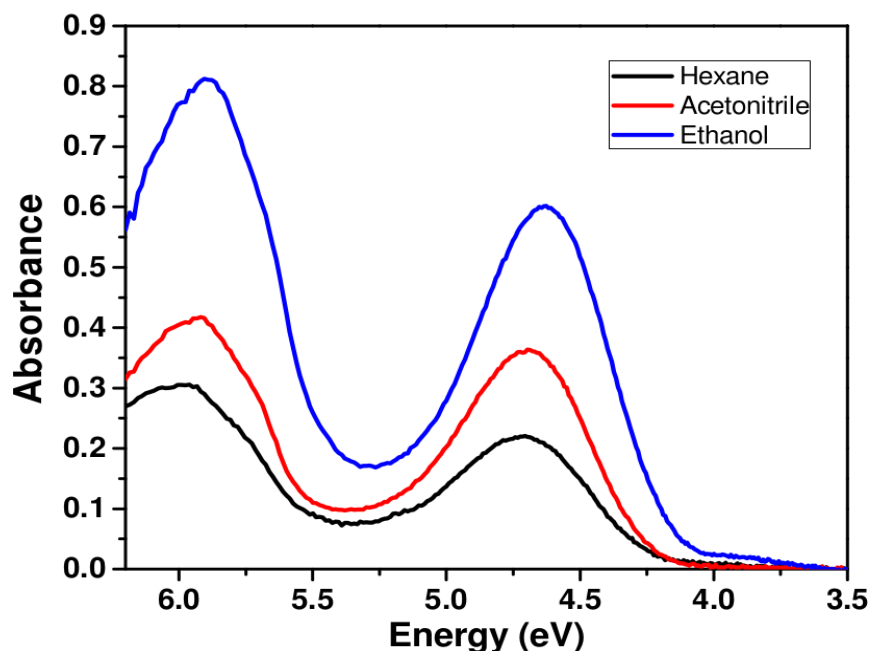

SM11: Experimental absorption spectrum of 3-HOX in different solvents.

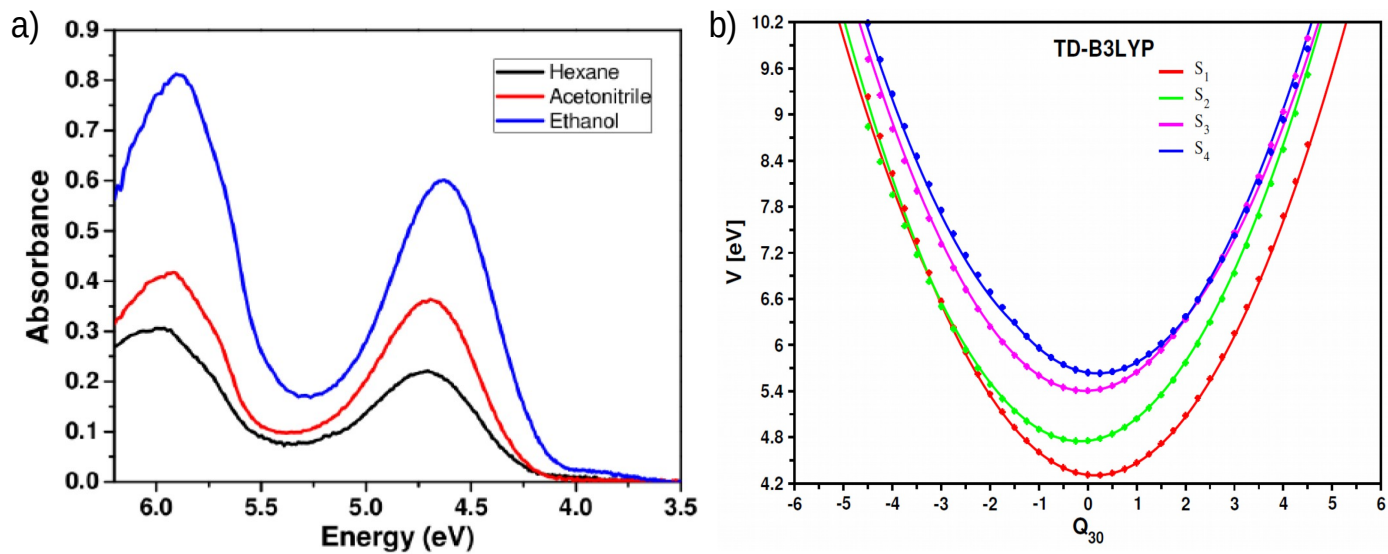

c)

| Electronic state | Excitation energy, in eV (osc. strength) |
|------------------|------------------------------------------|
| $S_1$            | 4.3113 (0.00)                            |
| $S_2$            | 4.7554 (0.11)                            |
| $S_3$            | 5.4053 (0.02)                            |
| $S_4$            | 5.6421 (0.00)                            |
| $S_5$            | 5.8654 (0.01)                            |
| $S_6$            | 6.1249 (0.00)                            |

SM12: a) Experimental absorption spectrum of 3HOX in different solvents. b) Adiabatic potential energy curves of low-lying states along the dimensionless normal coordinates O-H stretch vibration of 3HOX. c) Vertical excitation energy of enol structure with TDB3LYP/6311G++(3df,3pd) level of theory.

Table SM13:  $Q_c^{\min}$  of totally symmetric vibrations of 3HOX computed within the LVC approach using TDB3LYP/6311G++(3df,3pd) level of theory.

| a' mode    | $Q_c^{\min}$ |
|------------|--------------|
| $\nu_3$    | -0.70        |
| $\nu_5$    | 1.33         |
| $\nu_7$    | 0.13         |
| $\nu_8$    | 0.47         |
| $\nu_{11}$ | -0.74        |
| $\nu_{14}$ | -0.20        |
| $\nu_{16}$ | -1.01        |
| $\nu_{17}$ | -0.11        |
| $\nu_{18}$ | 0.21         |
| $\nu_{19}$ | -0.34        |
| $\nu_{20}$ | 0.21         |
| $\nu_{21}$ | 0.72         |
| $\nu_{22}$ | -0.50        |
| $\nu_{23}$ | -0.63        |
| $\nu_{24}$ | -0.29        |
| $\nu_{25}$ | -0.54        |
| $\nu_{26}$ | 0.29         |
| $\nu_{27}$ | -0.03        |
| $\nu_{28}$ | 0.06         |
| $\nu_{29}$ | 0.02         |
| $\nu_{30}$ | -0.11        |



a)

| Electronic state<br>(Keto tautomer) | Vertical Excitation energy, in eV<br>(osc. strength) |
|-------------------------------------|------------------------------------------------------|
| S <sub>1</sub>                      | 3.4629 (0.08)                                        |
| S <sub>2</sub>                      | 3.6866 (0.00)                                        |
| S <sub>3</sub>                      | 4.8740 (0.05)                                        |
| S <sub>4</sub>                      | 5.0518 (0.00)                                        |
| S <sub>5</sub>                      | 5.1833 (0.00)                                        |
| S <sub>6</sub>                      | 6.5241 (0.00)                                        |

b)

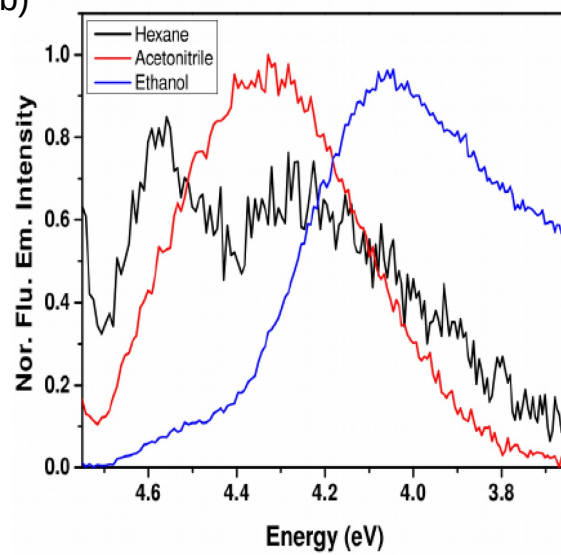

SM14: a) Vertical excitation energies of keto tautomer of 3HOX. b) Experimental fluorescence spectrum of 3HOX in different solvents.

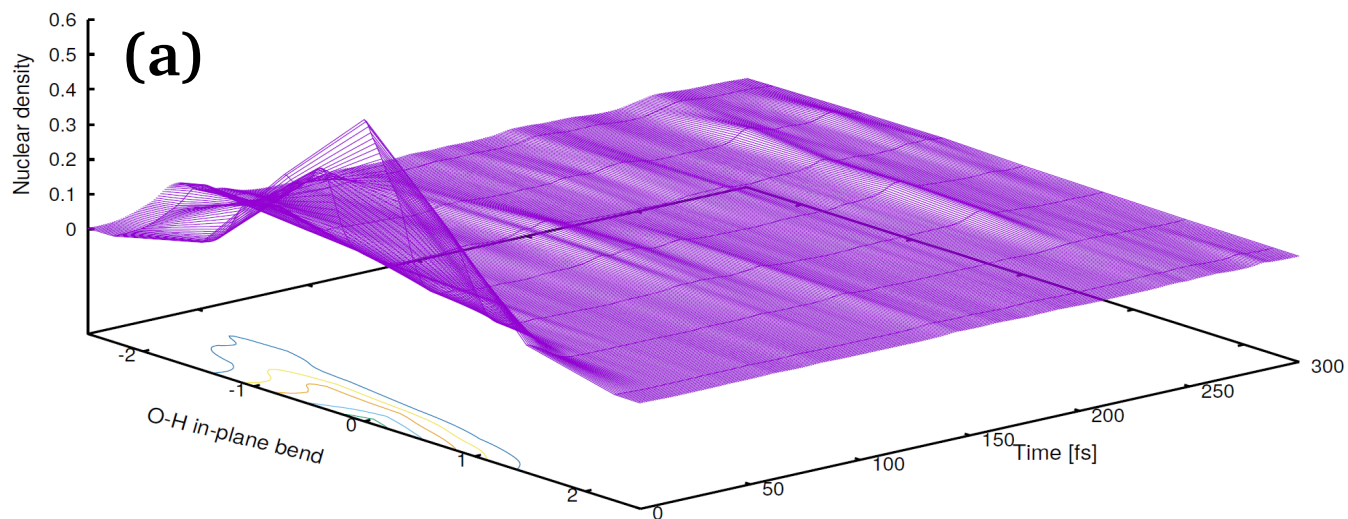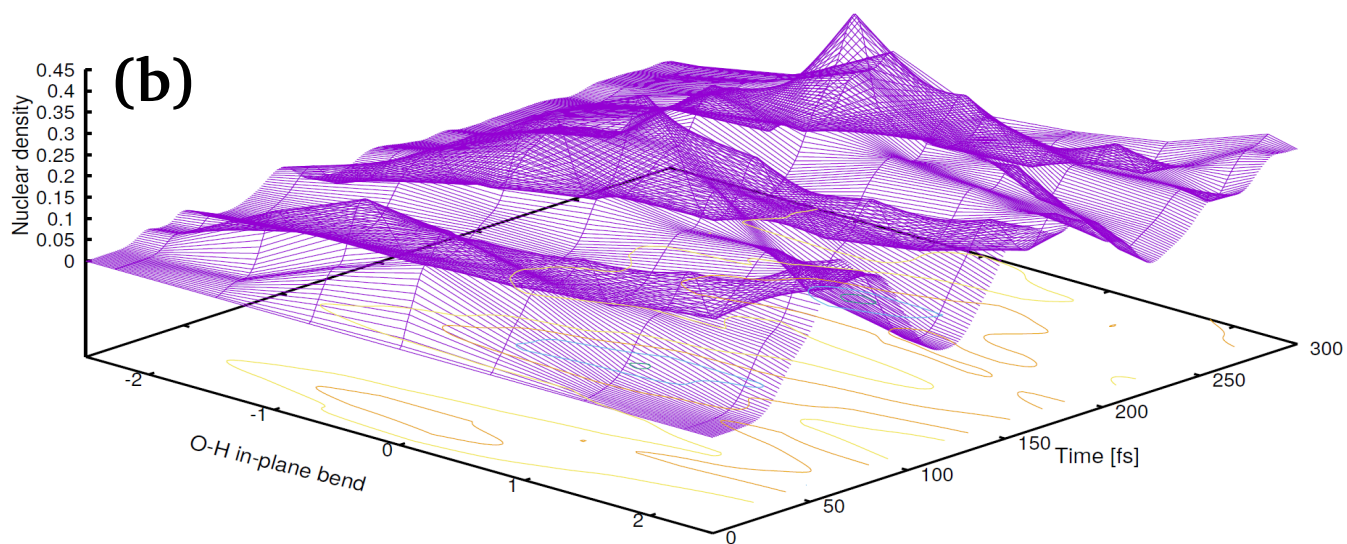

SM15: Time evolution of 1-dimensional nuclear density along the O-H in-plane bend coordinates (initial wavepacket on  $S_2$  state) for (a)  $S_2$  state (b)  $S_1$  state.

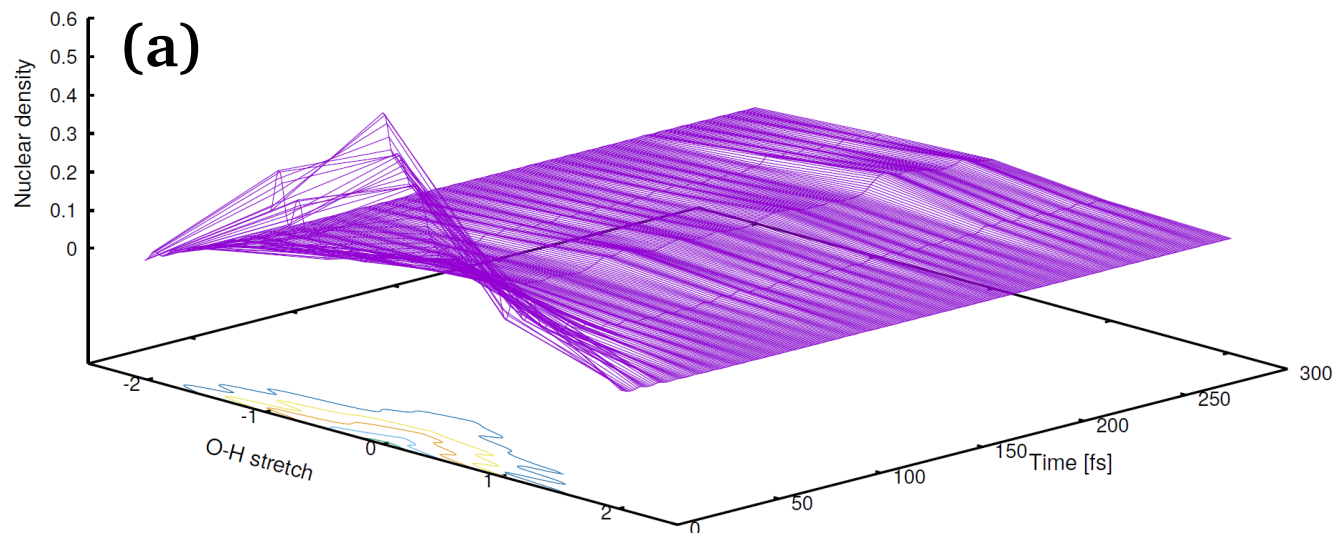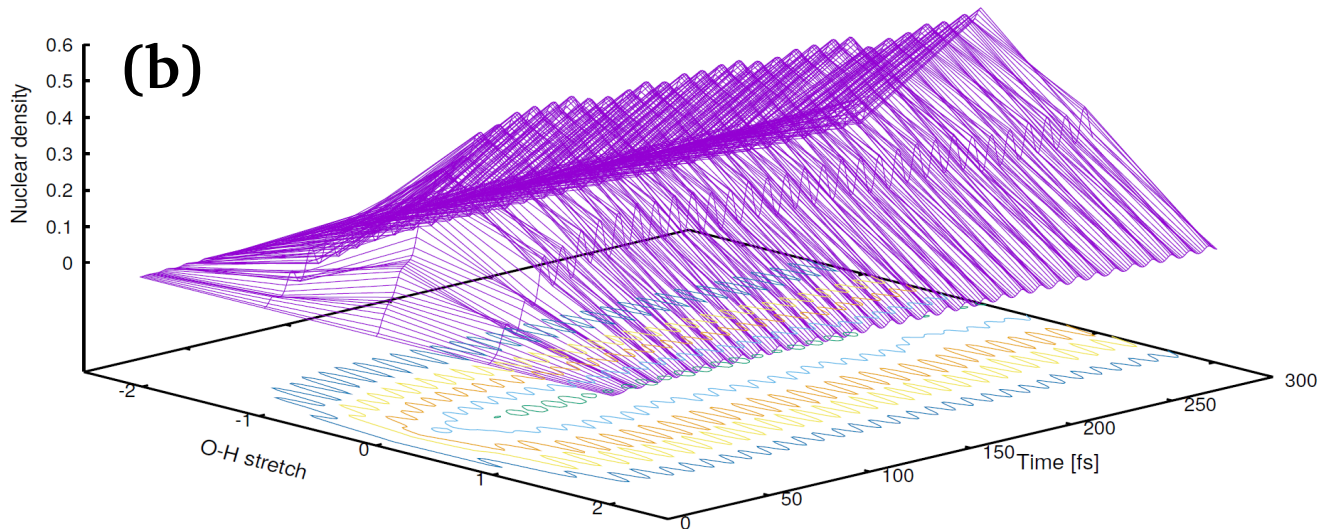

SM16: Time evolution of 1-dimensional nuclear density along the O-H stretch coordinates (initial wavepacket on  $S_2$  state) for (a)  $S_2$  state (b)  $S_1$  state .

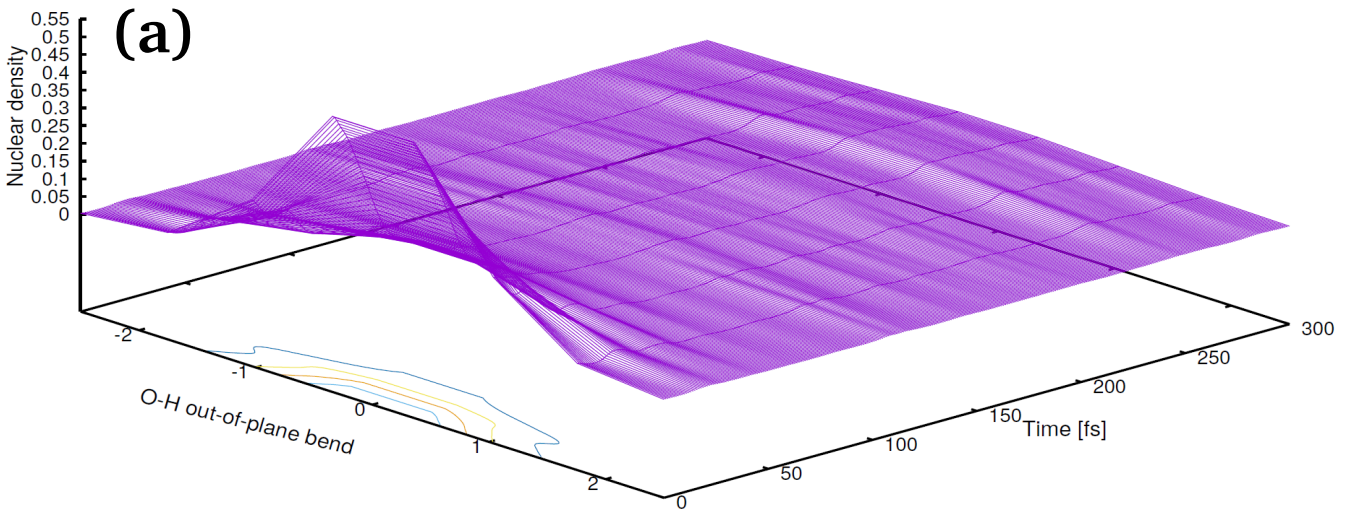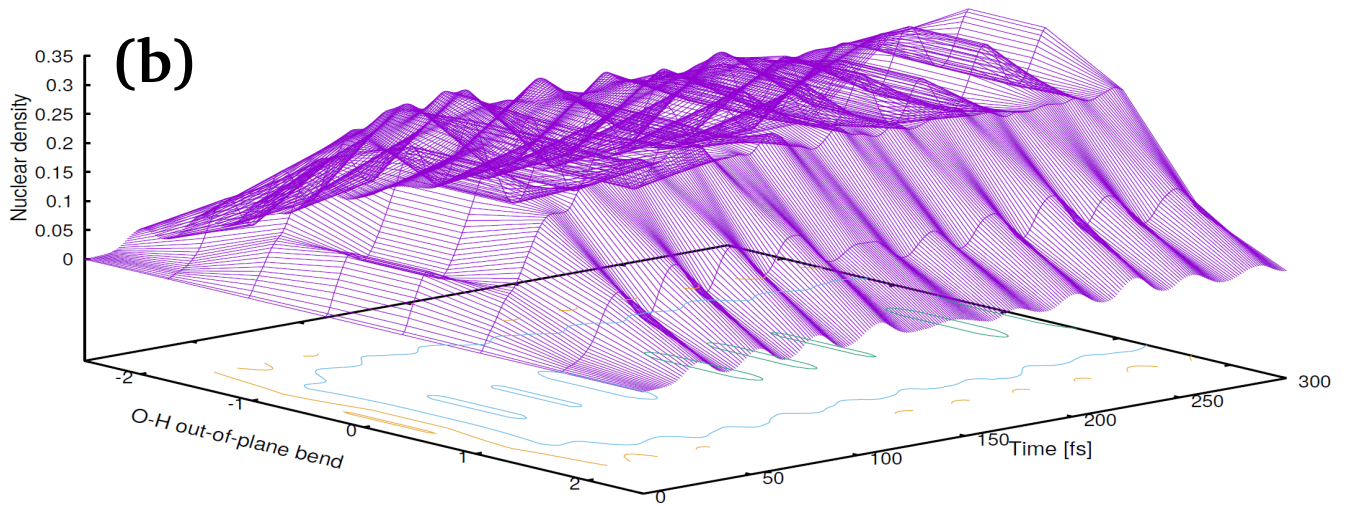

SM17: Time evolution of 1-dimensional nuclear density along the O-H out-of-plane coordinates (initial wavepacket on  $S_2$  state) for (a)  $S_2$  state (b)  $S_1$  state.
